# Supplementary material for: miR-302d Targeting of CDKN1A Regulates DNA Damage and Steroid Hormone Secretion in Bovine Cumulus Cells
Source: MDPI journal article supplement (doi:10.3390/genes14122195), 2023-12-10
Supplement: s1 [file s1]

**Table S1. Primer and siRNA sequences used in this study**

| Primers      | Sequence                                           | Product size | GenBank accession | PCR        |
|--------------|----------------------------------------------------|--------------|-------------------|------------|
| /siRNA       | (5' to 3') <sup>a</sup>                            |              | Number            | Efficiency |
| <i>FAS</i>   | F:AGCGAACTCCTGCCAAGAAG<br>R:TTCTGGTGTATCTCCGTCGC   | 110bp        | NM_174662.2       | 106.50%    |
| <i>p53</i>   | F:GAATGTCCGAATGAAGCGCC<br>R:GAGGGGACAAAGGACGACAG   | 131bp        | X81704.1          | 102.7%     |
| <i>BCL2</i>  | F:TGGCCTTCTTTGAGTTCGGA<br>R:GGCCATACAGCTCCACAAAG   | 181 bp       | NM_214285         | 104.10%    |
| <i>BAX</i>   | F:GGCGGCTGAAATGTTTCTGA<br>R:GTCCAATGTCCAGCCCATGAT  | 193 bp       | NM_000633.3       | 101.80%    |
| <i>CDK1</i>  | F:CATTGCGCCGGGATAAAGC<br>R:CCACTTGGCCTGTAGTTTTGTG  | 152 bp       | NM_001098958.1    | 103.23%    |
| <i>CDK2</i>  | F:GAGCCTCGGTTGCATCTTTG<br>R:CCACTTGGGGAAACTTGGCT   | 131 bp       | NM_001014934.1    | 98.61%     |
| <i>CCND1</i> | F:AACGGCTTCCTCTCCTATC<br>R:TCCTCCTCCTCCTCTTCC      | 145bp        | NM_001046273.2    | 105.11%    |
| <i>CCNE2</i> | F:GCTGCTGCTGCCTTATGC<br>R:TCTGTATGTTGTGTCTGTCTTCC  | 107bp        | XM_025001684.1    | 98.15%     |
| <i>RAD51</i> | F:CGCCCAAGATGACCACCAC<br>R:TGGTGGAATTTGGAGCTGGG    | 134bp        | NM_001046179.2    | 102.70%    |
| <i>BRCA1</i> | F:GCAGAGTGAACCTGAAAATCCT<br>R:TGTGTCTGCTGCTTTGTCCT | 158bp        | NM_178573.1       | 96.65%     |

|                 |                                                                                                                |       |                |         |
|-----------------|----------------------------------------------------------------------------------------------------------------|-------|----------------|---------|
| <i>ATM</i>      | F:GCCGTGATGACCTGAGACAAGATG<br>R:AGAACGCCACTTCGCTGAGAAAG                                                        | 144bp | NM_001205935.1 | 94.08%  |
| <i>MRE11</i>    | F:CGCTTCCGCCTTGACTGCTG<br>R:TCTGCCCTCTTCCTCCTCTTTGG                                                            | 135bp | XM_024975290.1 | 100.90% |
| <i>GAPDH</i>    | F:ACCCAGAAGACTGTGGATGG<br>R:ATGCCTGCTTCACCACCTTC                                                               | 247bp | NM_001034034.2 | 108.90% |
| <i>CDKN1A</i>   | F:GCAUGACAGAUUUCUACCATT<br>R:UGGUAGAAAUCUGUCAUGCTT                                                             | 104bp | NM_001098958.2 | 107.23% |
| <i>STAR</i>     | F:CTGAGCAGATCATGAAGACAGG<br>R:GTCCAGTTCATCTCCAATGCG                                                            | 104bo | NM_174189.3    | 100.90% |
| <i>CYP11A1</i>  | F:ACTGAGTACCTGAACCGGCA<br>R:CACTTATGGCCCAGATAGGCA                                                              | 147bp | NM_176644.2    | 95.88%  |
| <i>HSD3B1</i>   | F:GCCACTGGATGGCGAGTATT<br>R:AGGGAGACTGCCCCCTTCTTA                                                              | 200bp | NM_174343.3    | 107.00% |
| <i>U6</i>       | F:GCTTCGGCAGCACATATACTAAAAT<br>R:CGCTTCACGAATTTGCGTGTCAT<br>RT:CGCTTCACGAATTTGCGTGTCAT                         |       |                | 106.10% |
| <i>miR-302d</i> | F:GCGCGTAAGTGCTTCCATGT<br>R:AGTGCAGGGTCCGAGGTATT<br>RT:GTCGTATCCAGTGCAGGGTCCGAGGTATTTCGCACTGGATACGACACT<br>AAA |       |                | 99.98%  |
| siCDKN1A-1      | Sense-GCGGUGGAACUUCGACUUUTT<br>Antisense-AAAGUCGAAGUUCCACCGCTT                                                 |       |                |         |
| siCDKN1A-2      | Sense-GCAUGACAGAUUUCUACCATT                                                                                    |       |                |         |

|            |                                 |
|------------|---------------------------------|
| siCDKN1A-3 | Antisense-UGGUAGAAAUCUGUCAUGCTT |
|            | Sense-GCAGACUGAUCUGCUCCAATT     |
| siRNA-NC   | Antisense-UUGGAGCAGAUCAUCUGCTT  |
|            | Sense-UUCUCCGAACGUGUCACGUTT     |
|            | Antisense-ACGUGACACGUUCGGAGAATT |

---

<sup>a</sup> F: Forward primer; R: Reverse primer; RT: Reverse transcription primer.
